# Supplementary material for: A Computational Approach to Identify Potential Novel Inhibitors against the Coronavirus SARS‐CoV‐2
Source: PubMed Central journal article supplement — Mol Inform. 2020 Jul 28;39(10):2000090. doi: 10.1002/minf.202000090 (PMC7583376; doi:10.1002/minf.202000090), 2020-07-28

# molecular informatics

Supporting Information

## **A Computational Approach to Identify Potential Novel Inhibitors against the Coronavirus SARS-CoV-2**

Verena Battisti, Oliver Wieder, Arthur Garon, Thomas Seidel, Ernst Urban, and Thierry Langer\*© 2020 The Authors. Published by Wiley-VCH Verlag GmbH & Co. KGaA. This is an open access article under the terms of the Creative Commons Attribution Non-Commercial NoDerivs License, which permits use and distribution in any medium, provided the original work is properly cited, the use is non-commercial and no modifications or adaptations are made.

## Supporting Information

# A Computational Approach to Identify Potential Novel Inhibitors against the Coronavirus SARS- CoV-2

*Verena Battisti<sup>‡</sup>, Oliver Wieder<sup>‡</sup>, Arthur Garon<sup>‡</sup>, Thomas Seidel<sup>‡</sup>, Ernst Urban<sup>‡</sup>, Thierry Langer<sup>‡</sup>,\**

<sup>‡</sup>University of Vienna, Department of Pharmaceutical Chemistry, Althanstraße 14, A-1090 Vienna, Austria

---

### Content

---

|                                                              |         |
|--------------------------------------------------------------|---------|
| Details on the 10 Protein-Systems Used in the MD Simulations | Page S2 |
| Plots of the RMSD for each protein with their ligand         | Page S2 |

---

**Table S1. Details on the 10 Protein-Systems Used in the MD Simulations.**

| <i>Protein-System</i> | <i>Box Size<br/>(Angstrom<sup>3</sup>)</i> | <i>Number of<br/>Water<br/>Molecules</i> | <i>Number<br/>of Cl<sup>-</sup><br/>Ions</i> | <i>Number<br/>of K<sup>+</sup><br/>Ions</i> | <i>Total<br/>Number of<br/>Atoms</i> |
|-----------------------|--------------------------------------------|------------------------------------------|----------------------------------------------|---------------------------------------------|--------------------------------------|
| <i>QHD43421_0</i>     | 69                                         | 9961                                     | 31                                           | 27                                          | 32003                                |
| <i>QHD43415_5</i>     | 95                                         | 26196                                    | 73                                           | 75                                          | 83523                                |
| <i>QHD43415_7</i>     | 57                                         | 5618                                     | 14                                           | 14                                          | 18301                                |
| <i>QHD43415_9</i>     | 67                                         | 9134                                     | 31                                           | 25                                          | 29312                                |
| <i>QHD43415_10</i>    | 77                                         | 14042                                    | 40                                           | 39                                          | 44325                                |
| <i>QHD43415_11</i>    | 139                                        | 77437                                    | 219                                          | 229                                         | 247623                               |
| <i>QHD43415_12</i>    | 120                                        | 52501                                    | 162                                          | 148                                         | 167293                               |
| <i>QHD43415_13</i>    | 146                                        | 96920                                    | 279                                          | 275                                         | 299720                               |
| <i>QHD43415_14</i>    | 94                                         | 24826                                    | 69                                           | 79                                          | 80199                                |
| <i>QHD43415_15</i>    | 78                                         | 13821                                    | 40                                           | 37                                          | 46317                                |

**Table S2. Plots of the RMSD for the Proteins and for their Ligand**

*Protein-System* | *RMSD Plot*

*QHD  
43421\_0*

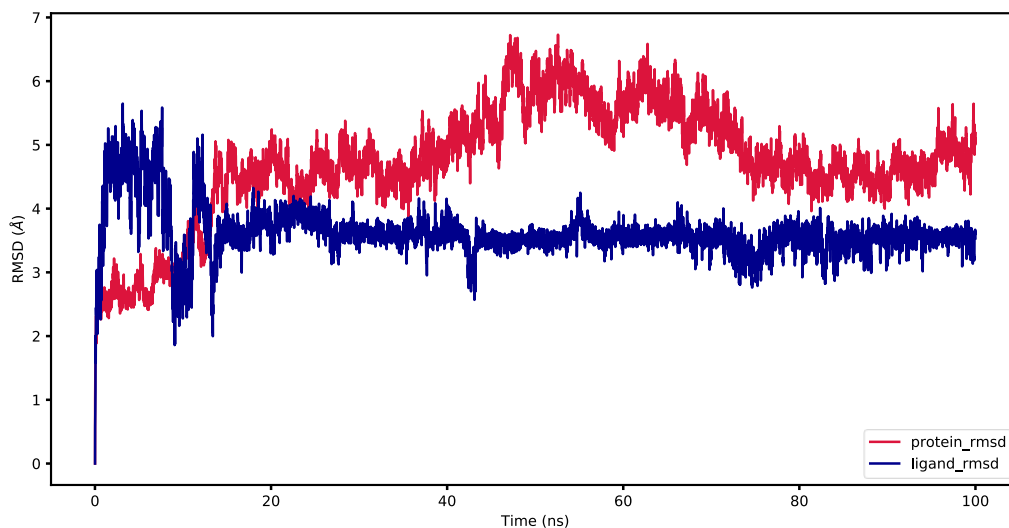

*QHD*  
43415\_5

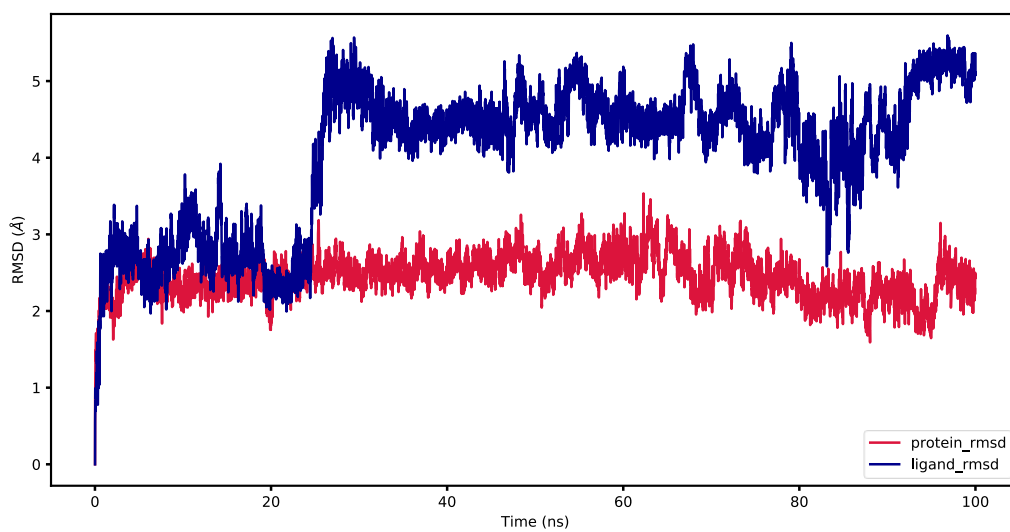

*QHD*  
43415\_7

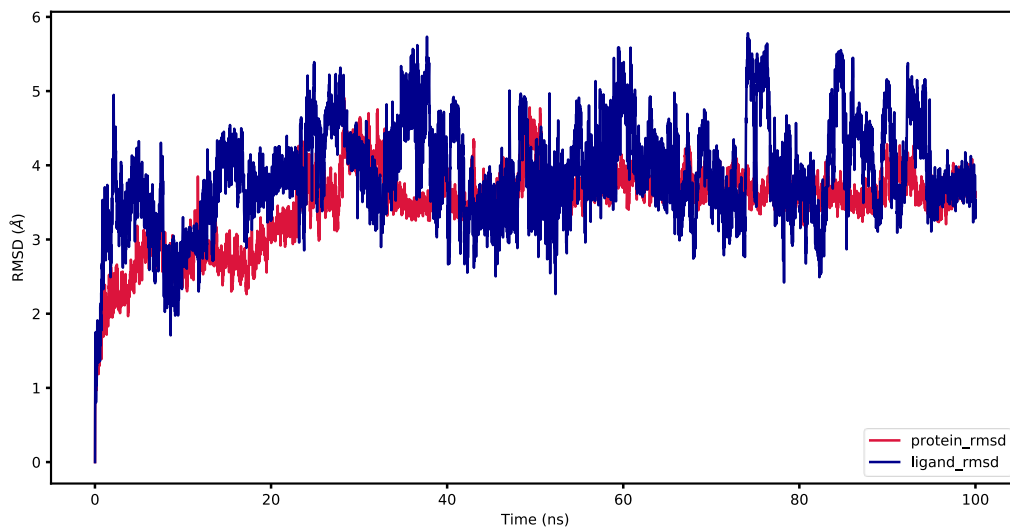

*QHD*  
43415\_9

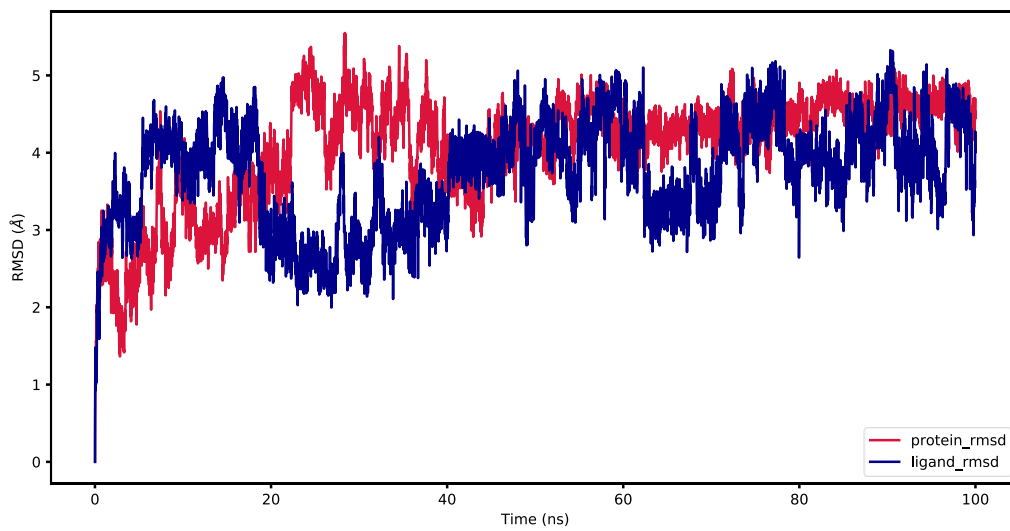

*QHD*  
43415\_10

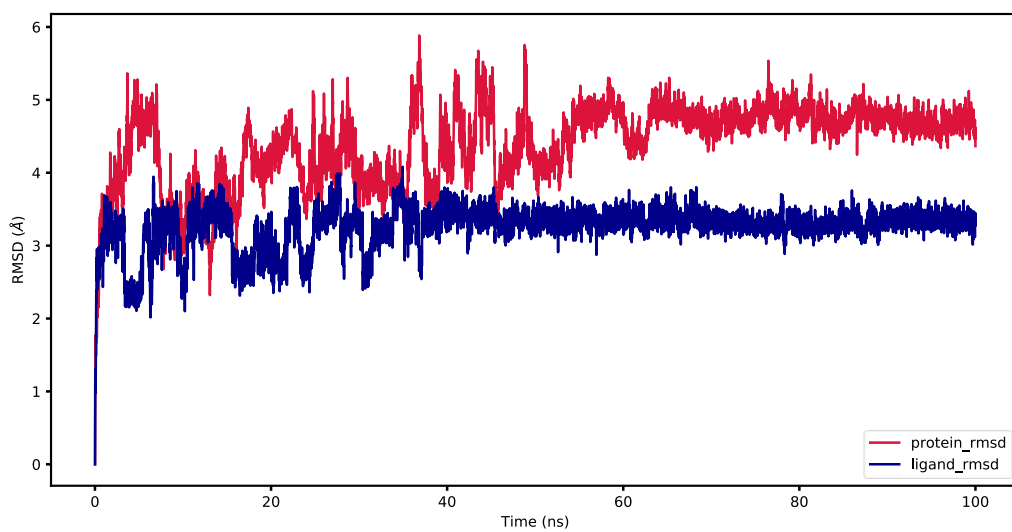

*QHD*  
43415\_11

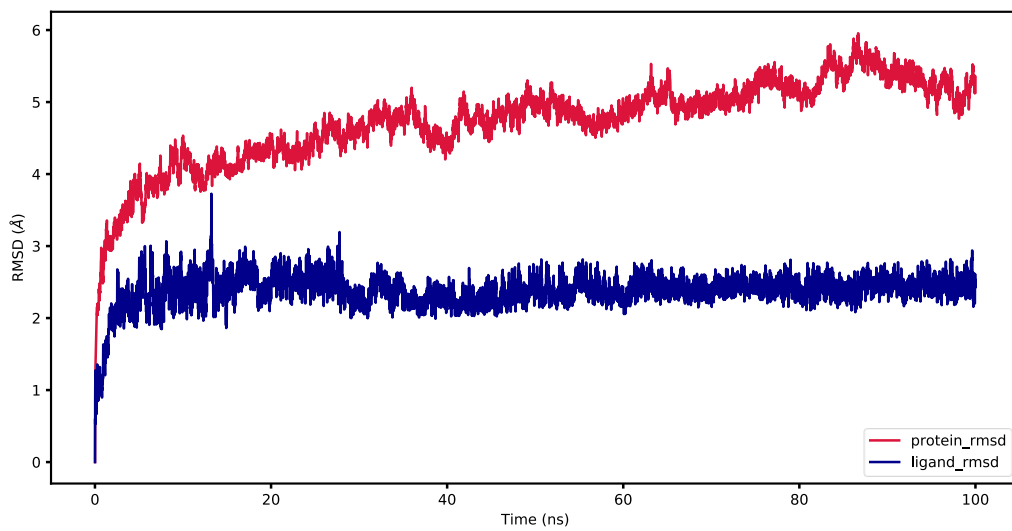

*QHD*  
43415\_12

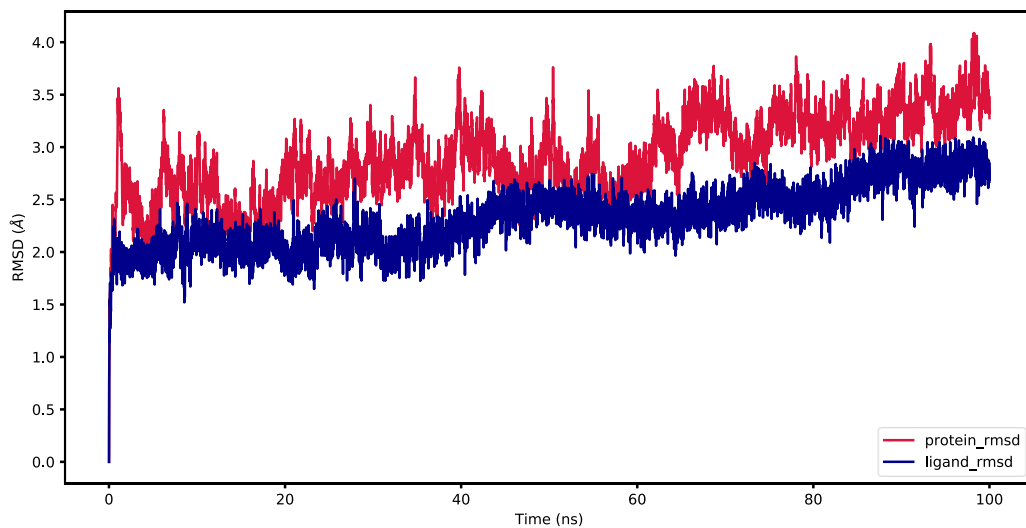

*QHD*  
43415\_13

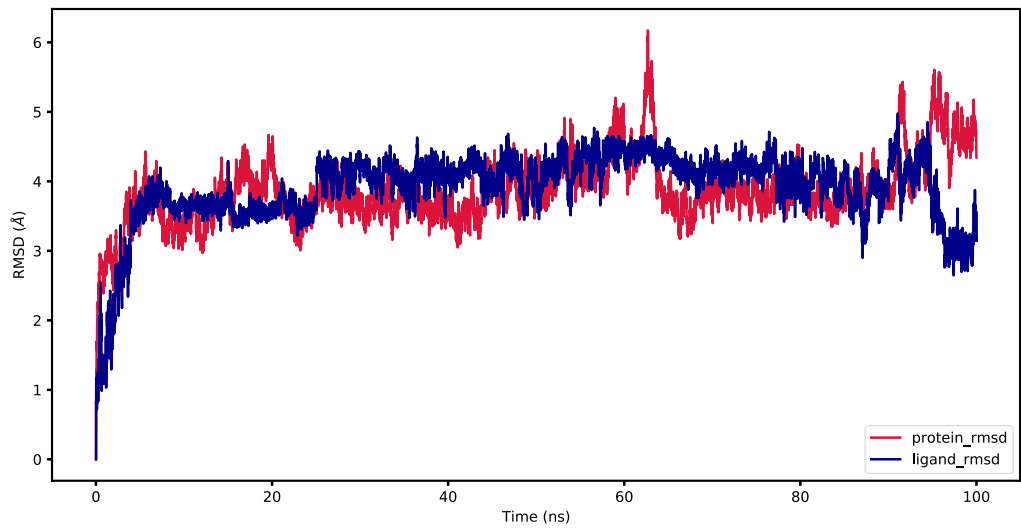

*QHD*  
43415\_14

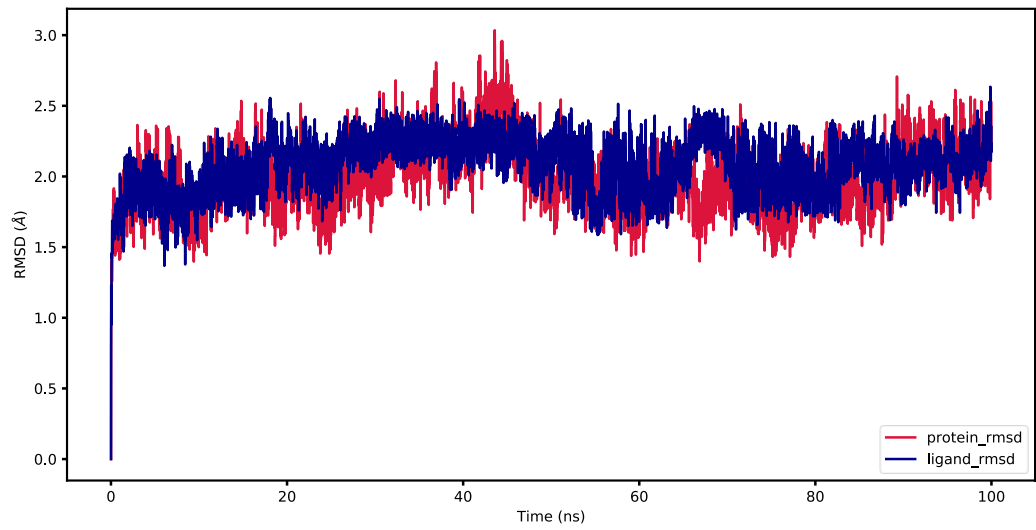

*QHD*  
43415\_15

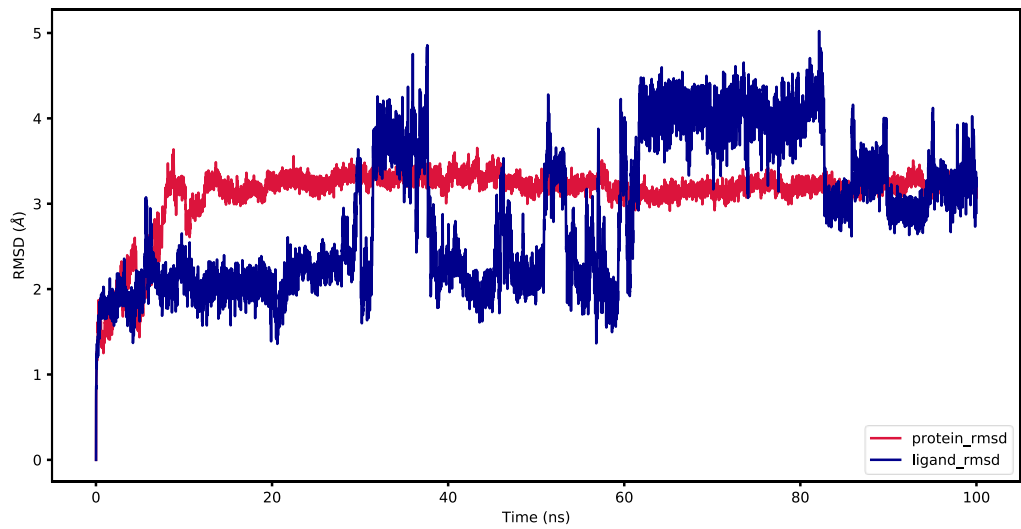

Supplement: MINF-39-2000090-s001.pdf [file MINF-39-2000090-s001.pdf]
